# Supplementary material for: Photothermal synthesis of a CuOx&FeOy catalyst with a layered double hydroxide-derived pore-confined frame to achieve photothermal CO2 hydrogenation to CO with a rate of 136 mmol min−1 gcat−1
Source: Royal Society of Chemistry journal article supplement (doi:10.1039/d2na00315e), 2022-01-01
Supplement: d2na00315e1.pdf [file d2na00315e1.pdf]

## Supplementary Information

**Photothermal synthesis of  $\text{CuO}_x\&\text{FeO}_y$  catalyst with layered double hydroxides-derived pore-confined frame to achieve photothermal  $\text{CO}_2$  hydrogenation to CO with a rate of  $136 \text{ mmol min}^{-1} \text{ g}_{\text{cat}}^{-1}$**

Lizhu Song<sup>a</sup>, Xinli Yi<sup>a</sup>, Shuxin Ouyang<sup>\*,b</sup>, Jinhua Ye<sup>a,c</sup>

<sup>a</sup> *TJU-NIMS International Collaboration Laboratory, School of Materials Science and Engineering, Tianjin University, Tianjin 300072, P. R. China*

<sup>b</sup> *Key Laboratory of Pesticide and Chemical Biology, Ministry of Education, College of Chemistry, Central China Normal University, Wuhan 430079, P. R. China*

<sup>c</sup> *International Center for Materials Nanoarchitectonics (WPI-MANA), National Institute for Materials Science (NIMS), 1-1 Namiki, Tsukuba 305-0047, Japan*

## Experimental Section

### Synthesis of catalyst precursors:

Typically, 0.38 g  $\text{Cu}(\text{NO}_3)_2 \cdot 3\text{H}_2\text{O}$ , 0.14 g  $\text{Fe}(\text{NO}_3)_3 \cdot 9\text{H}_2\text{O}$  and 0.5 g LDH ( $\text{Mg}_6\text{Al}_2(\text{CO}_3)(\text{OH})_{16} \cdot 4\text{H}_2\text{O}$ ) were dissolved in 20 mL deionized water. Then the ethanol (10 mL) was added into the mixture and ultrasound-treated for 5 min to benefit the uniform dispersion of the LDH. All the water was evaporated through a simple evaporation process under magnetic stirring of the heating magnetic stirrer. Then the sample was transferred into a vacuum drying oven and dried at 70°C for 12 h to obtain the final powder. Following the same procedure, the powder samples consist of different components supported by different supports ( $\text{Al}_2\text{O}_3$ , MgO etc.) were synthesized follow the same procedure.

For comparison, the T-CuO<sub>x</sub>&FeO<sub>y</sub>/MAO catalyst was obtained by calcining the powder in 10% H<sub>2</sub>-Ar at 1015°C for 2 h.

### Characterizations of catalysts:

The crystal structure was characterized by X-ray diffractometer (D/max-2500, Rigaku, Japan). The light adsorption properties of the catalysts were measured by Ultraviolet-visible (UV-Vis) spectroscopy (UV-2700, Shimadzu, Japan). The microstructure of the catalyst was performed on Scanning electron microscopy (SEM, Quanta FEG 250) and Transmission electron microscopy (TEM, JEM-F200). The spatial distribution of element was confirmed by energy-dispersive X-ray spectroscopy (EDS). The chemical valence state of the element was measured by Xray photoelectron spectroscopy (XPS, Escalab 250Xi, Thermo Fisher Scientific, England). Fourier transform infrared spectroscopy (FT-IR) was recorded by Nicolet 6700 Fourier transform instrument. The Brunauer-Emmett-Teller (BET) surface area and pore structure of the catalyst were analyzed by BET surface area measurement (Autosorb IQ2, Quantachrome, U.S.A.). The temperature of the catalyst surface was measured by a thermocouple (DT-311N).

### Activity evaluation:

The reverse water gas shift (RWGS) reaction was carried out in a flow-type photothermal reactor. The process was as follows: 30 mg of the catalyst powder was spread onto a round shape air-permeable quartz fiber filter that was fixed on the sample stage of the reactor. The reaction gases of H<sub>2</sub> and CO<sub>2</sub> (the molar ratio of H<sub>2</sub>: CO<sub>2</sub> = 1: 1) were injected into the reactor and the total flowrate was 400.0 mL min<sup>-1</sup>. A 300 W Xe lamp (CEL-HXF300, CEAULIGHT) equipped with a quartz convergent lens group (FF50Q, MEIWO) was used as the light source, the power of the incident irradiation was 41.3 W (1.42 W/cm<sup>2</sup>). The focused irradiation areas of Xe lamp with and without quartz convergent lens group were 29.09 and 0.95 cm<sup>2</sup>, respectively. Thus, the irradiation intensity was 439.4 kW m<sup>-2</sup> (439.4 suns) over catalyst surface. The gas products were detected by gas chromatography (GC-2014C, Shimadzu Co., Japan) equipped with a Poropak Q chromatographic column, a flame ionization detector (FID) and a methanizer. The flow rates of the gas products were measured by a soap flowmeter. The temperature of the catalyst surface was measured using a digital thermocouple (CUSTOM CT-1200D).

### The calculations of gas conversion and generation rates:

$$CO_2(\%) = \frac{Inlet(CO_2) - outlet(CO_2)}{Inlet(CO_2)} \times 100\% \quad (1)$$

$$r(CO) = \frac{c(CO) * F}{m} \quad (2)$$

$$Sel(CO) = \frac{m * r(CO)}{Inlet(CO_2) - outlet(CO_2)} \times 100\% \quad (3)$$

Where  $CO_2(\%)$  represents the conversion of CO<sub>2</sub>,  $Inlet(CO_2)$  and  $Outlet(CO_2)$  represent the flow rate of CO<sub>2</sub> at the inlet and outlet;  $r(CO)$  represents the generation rates of CO,  $F$  represents the total flow rate of the products,  $c(CO)$  represents the mole percent of CO in it,  $m$  represents the mass of the catalyst;  $Sel(CO)$  represent the selectivity of CO, respectively.



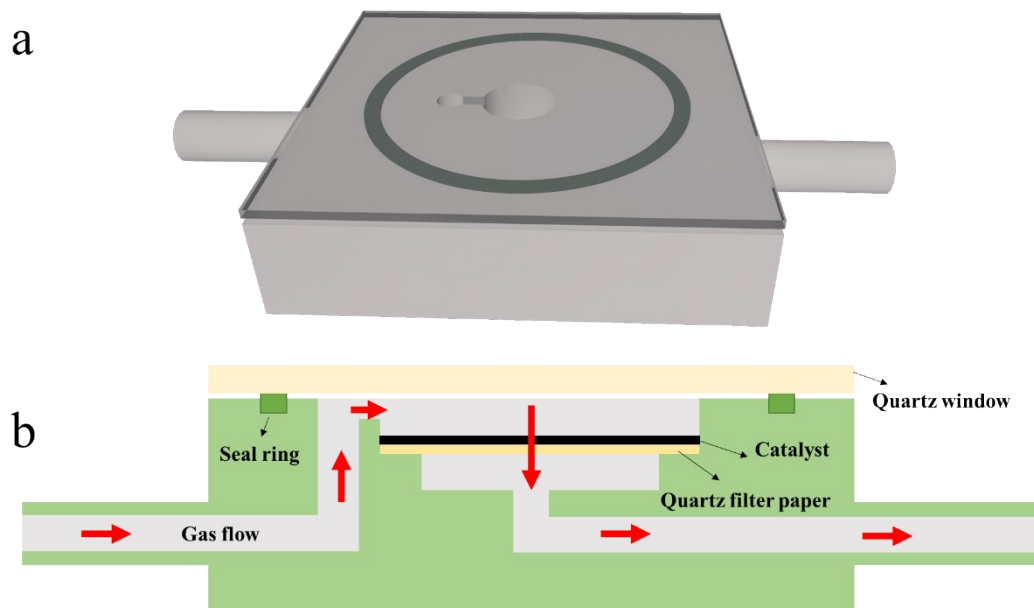

**Fig. S1.** **a** 3-D model illustration and **b** illustrated scheme of the flow-type reactor.

**Table S1.** Specific surface area of the catalyst before and after reaction.

| <b>CuO<sub>x</sub>&amp;FeO<sub>y</sub>/MAO</b> | $S_{\text{BET}}$<br>(m <sup>2</sup> g <sup>-1</sup> ) | Pore volume<br>(cm <sup>3</sup> g <sup>-1</sup> ) | Average pore size<br>(nm) |
|------------------------------------------------|-------------------------------------------------------|---------------------------------------------------|---------------------------|
| Before reaction                                | 12.4                                                  | 0.030                                             | 2.769                     |
| After reaction                                 | 34.9                                                  | 0.070                                             | 3.627                     |

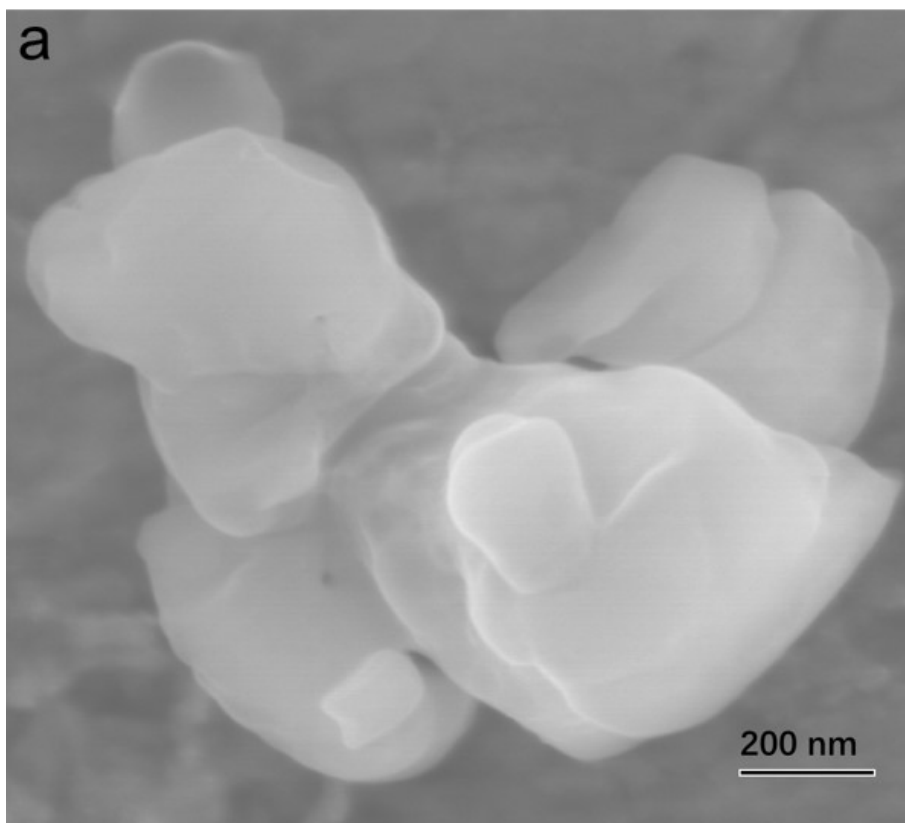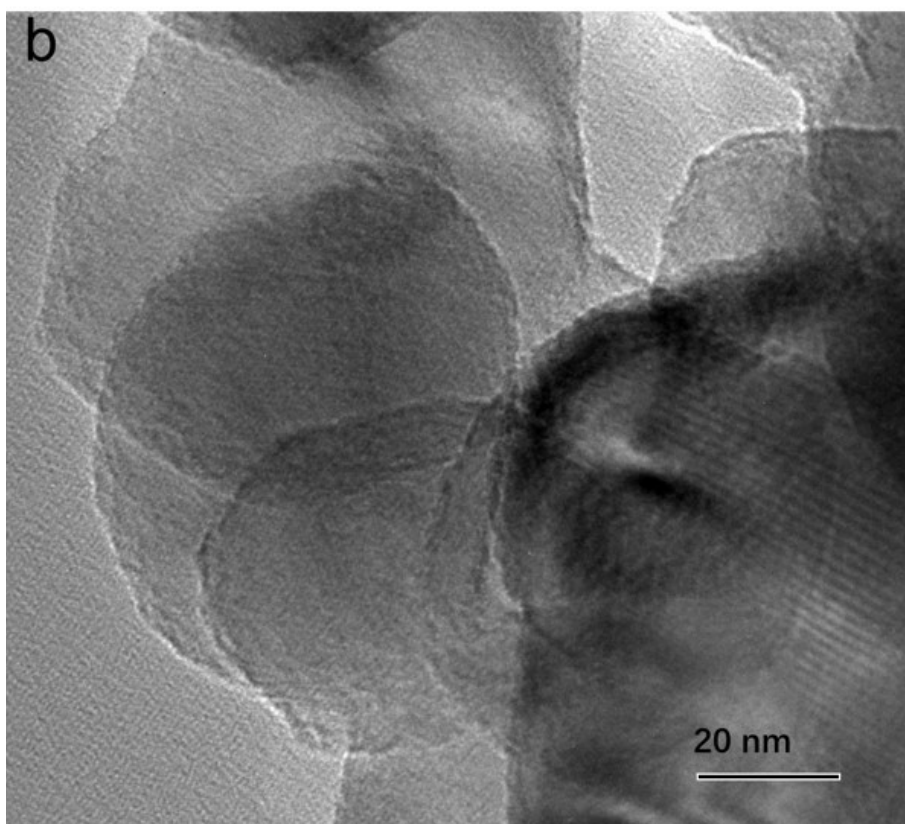

**Fig. S2.** **a** SEM image and **b** TEM image of LDH.

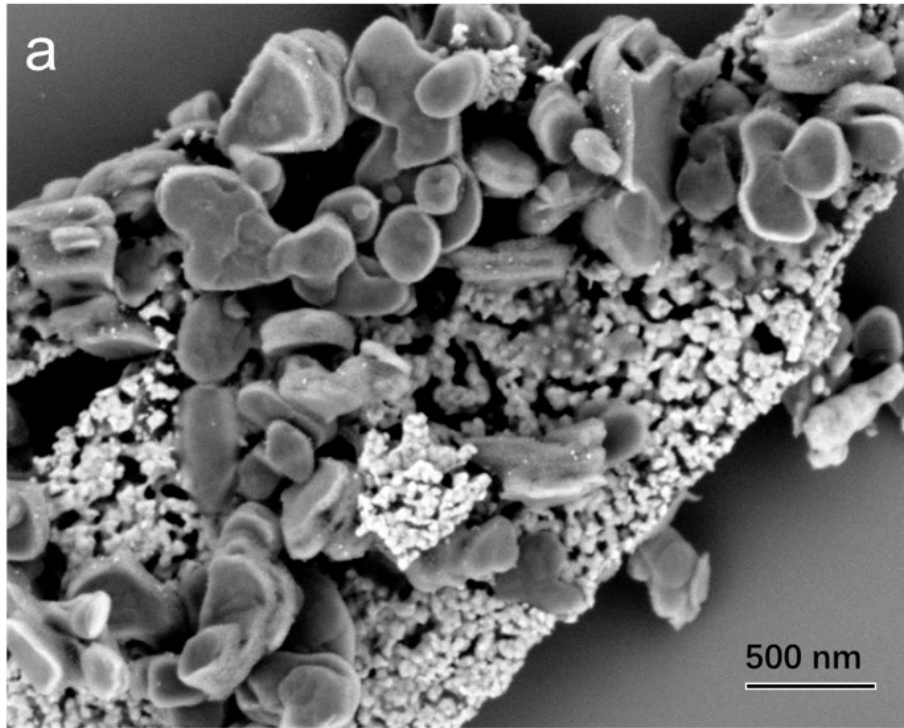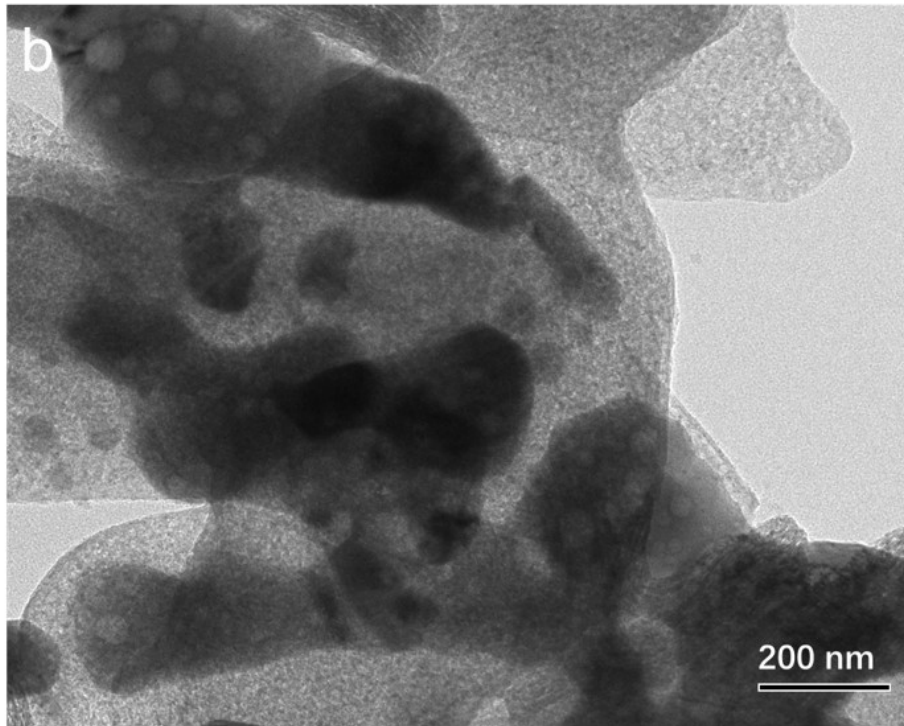

**Fig. S3.** a SEM image and b TEM image of CuO<sub>x</sub>/MAO after RWGS reaction.



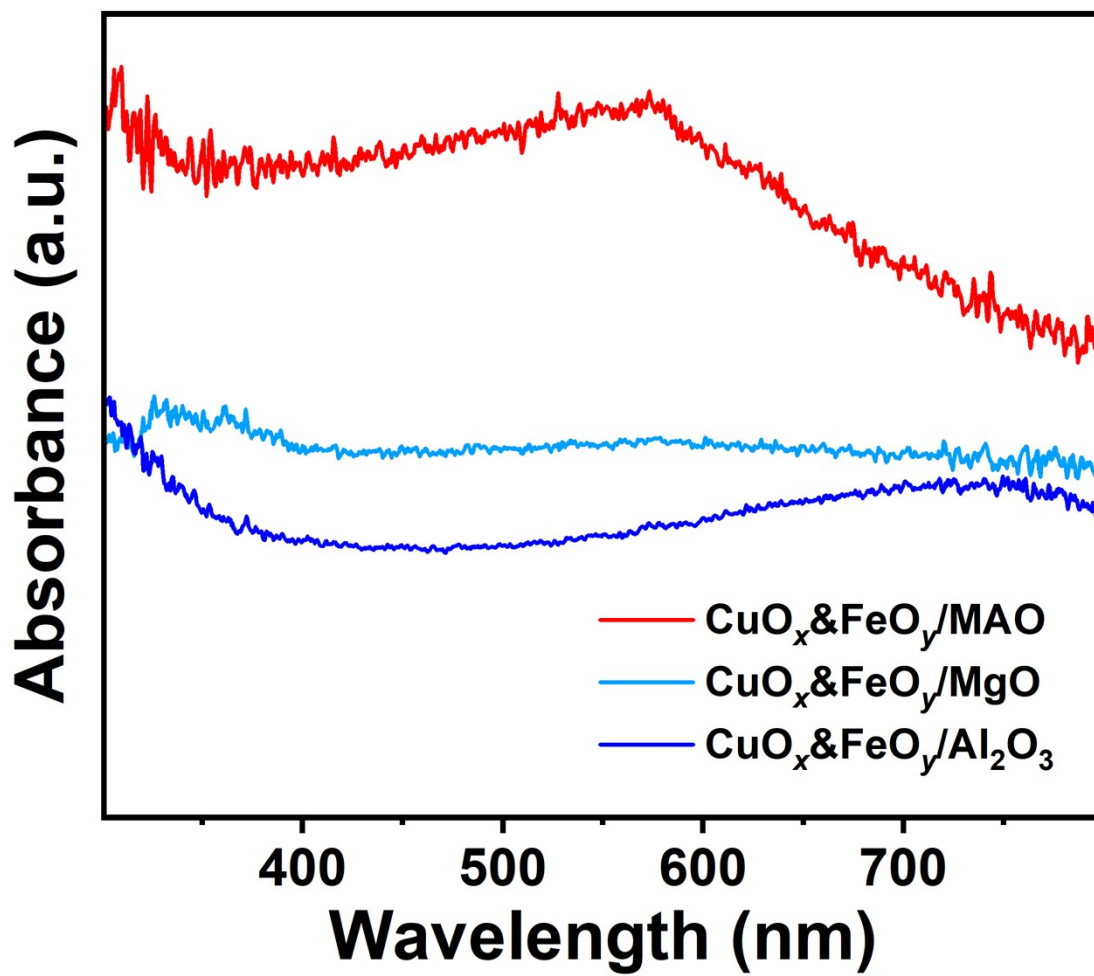

Fig. S4. UV-Vis absorption spectra of the catalysts after RWGS reaction.

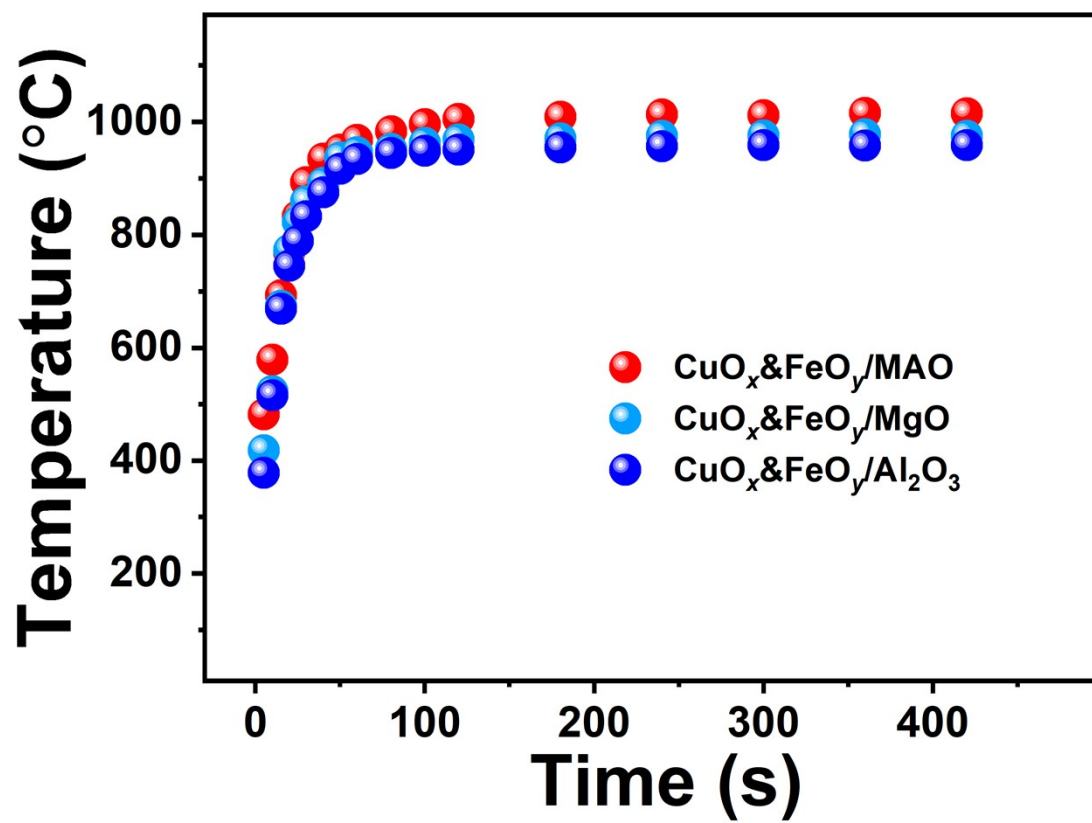

Fig. S5. Temperature variation curves of the catalysts during the reaction.

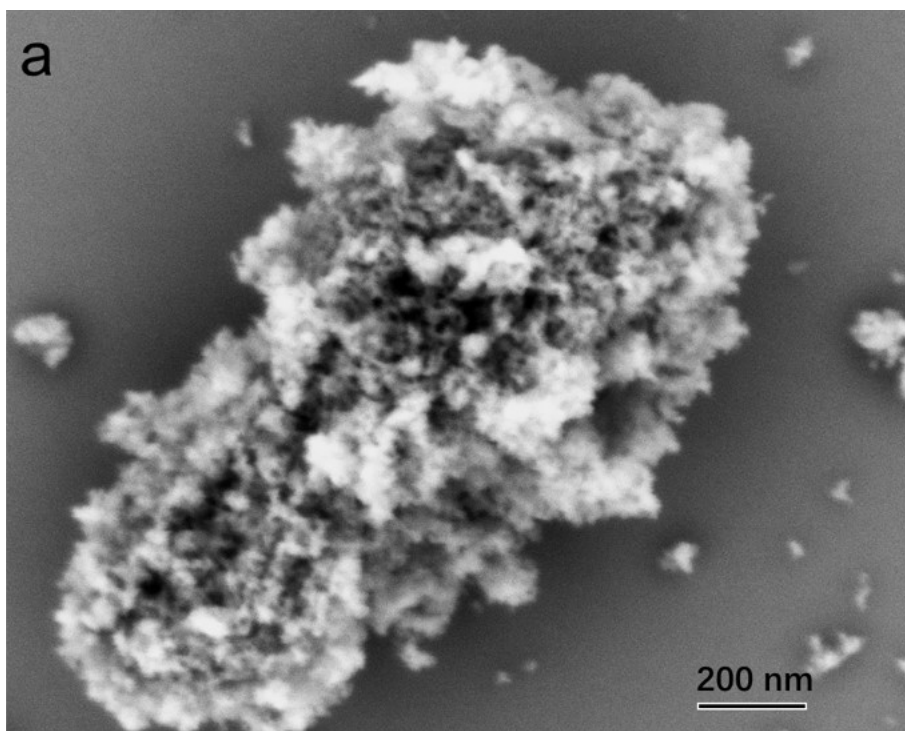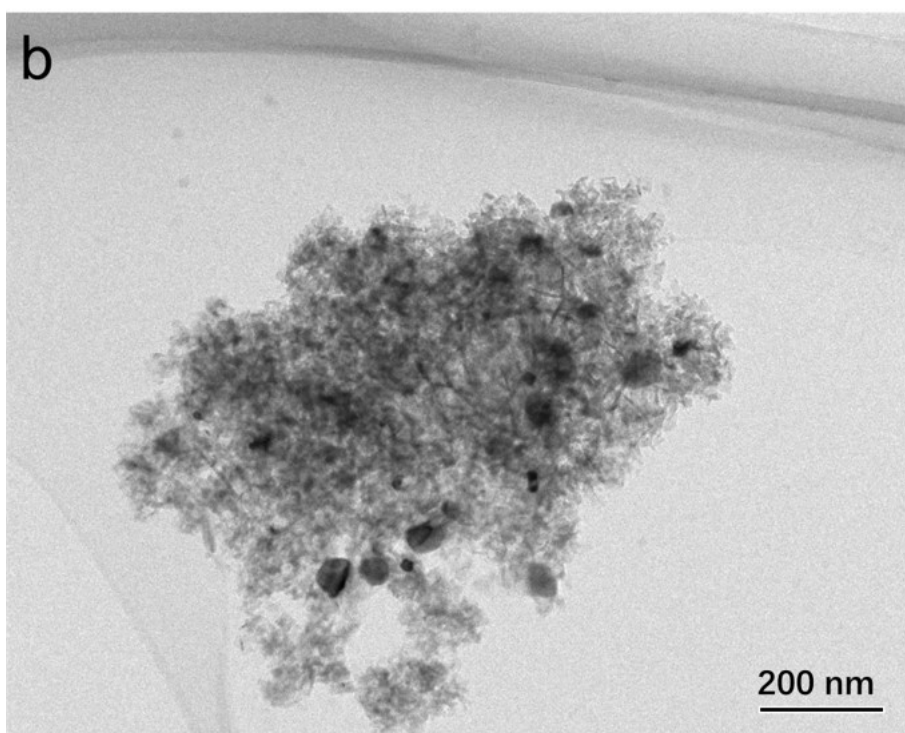

**Fig. S6.** a SEM image and b TEM image of  $\text{CuO}_x\&\text{FeO}_y/\text{Al}_2\text{O}_3$  after RWGS reaction.

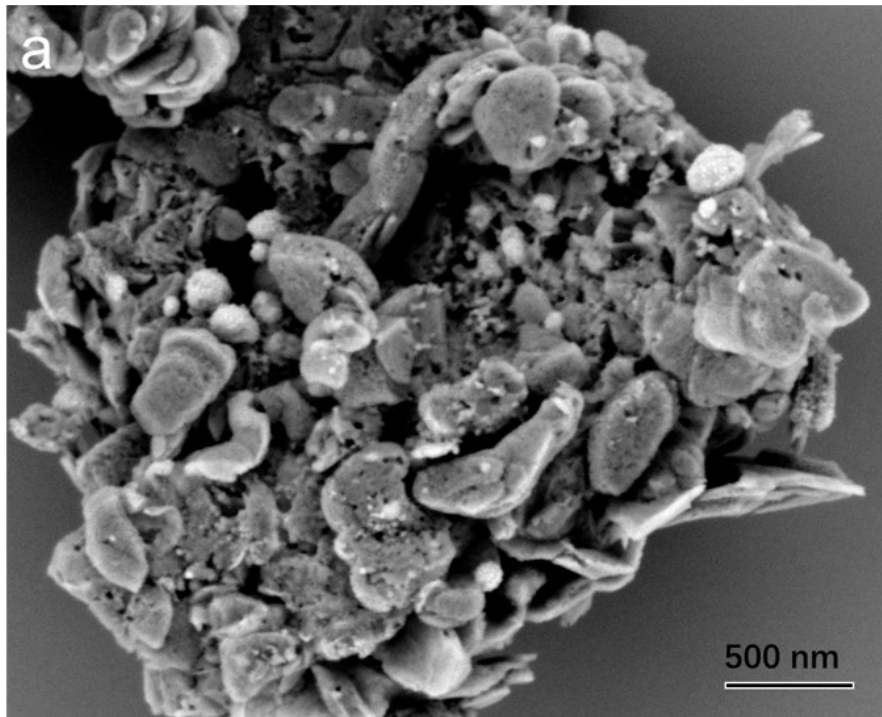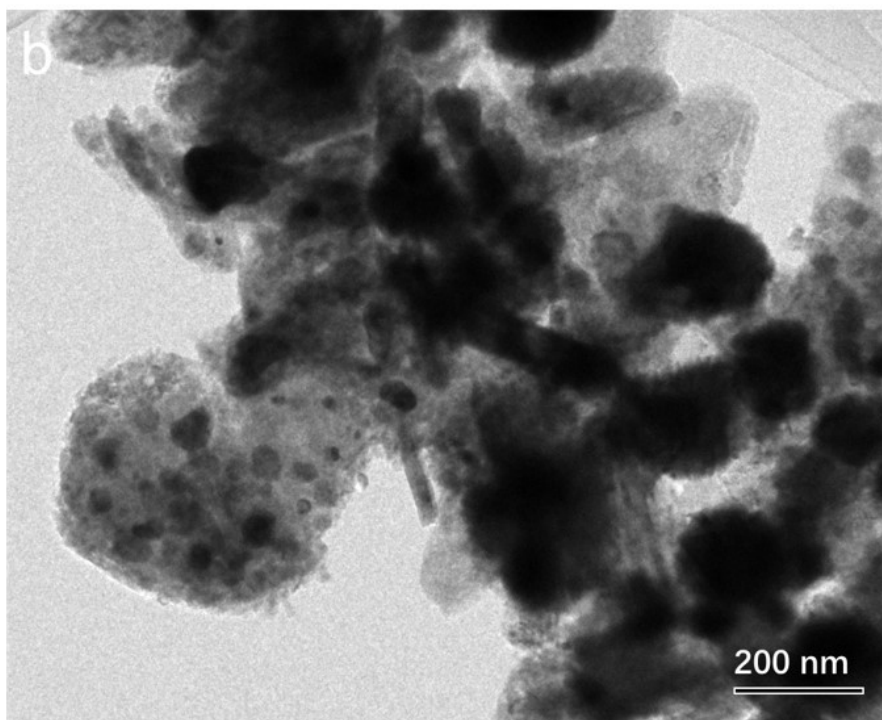

**Fig. S7.** **a** SEM image and **b** TEM image of  $\text{CuO}_x\&\text{FeO}_y/\text{MgO}$  after RWGS reaction.

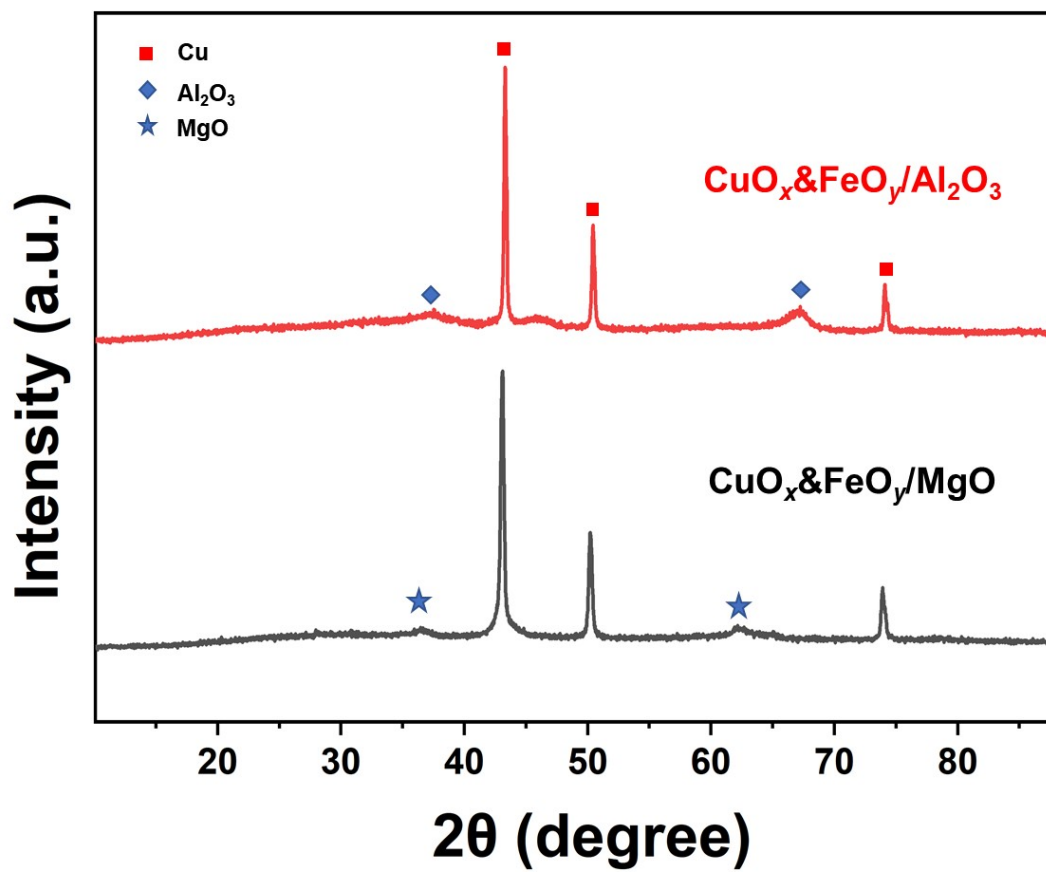

Fig. S8. XRD of CuO<sub>x</sub>&FeO<sub>y</sub>/Al<sub>2</sub>O<sub>3</sub> and CuO<sub>x</sub>&FeO<sub>y</sub>/MgO after RWGS reaction.

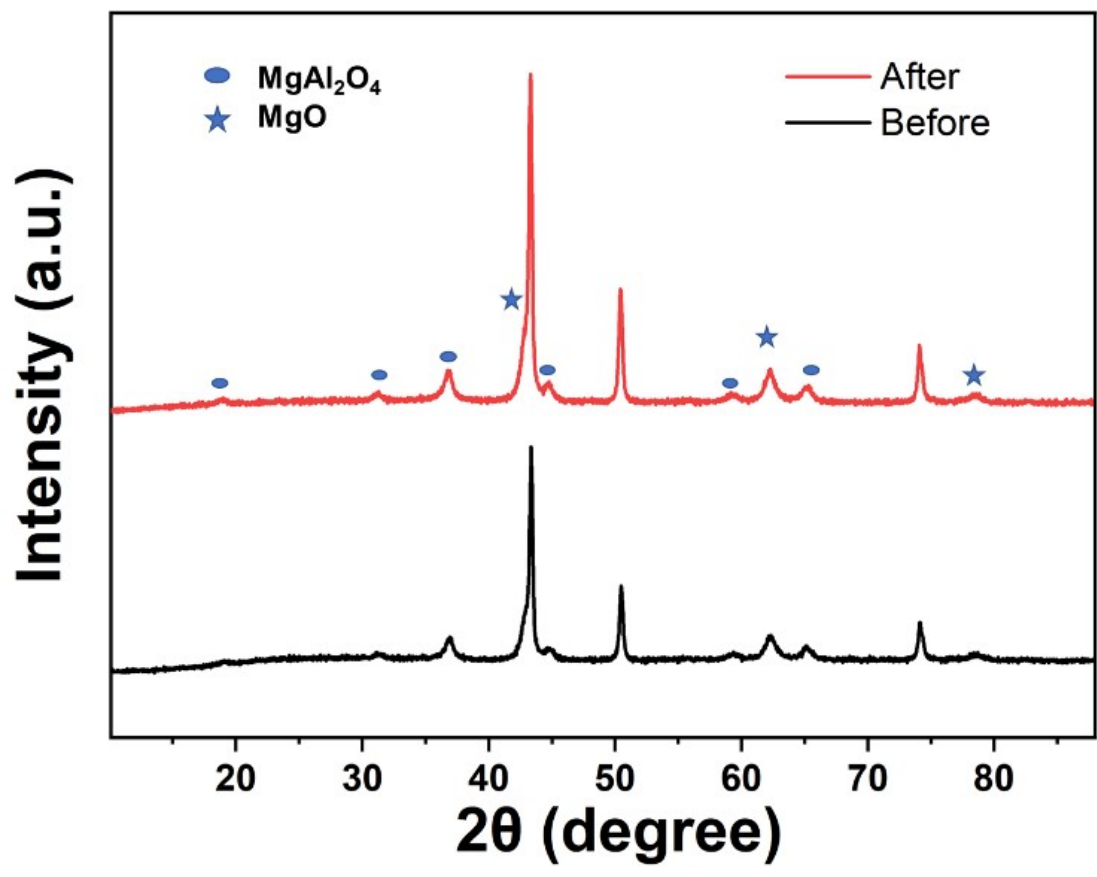

Fig. S9. XRD of T-CuO<sub>x</sub>&FeO<sub>y</sub>/MAO before and after RWGS reaction.

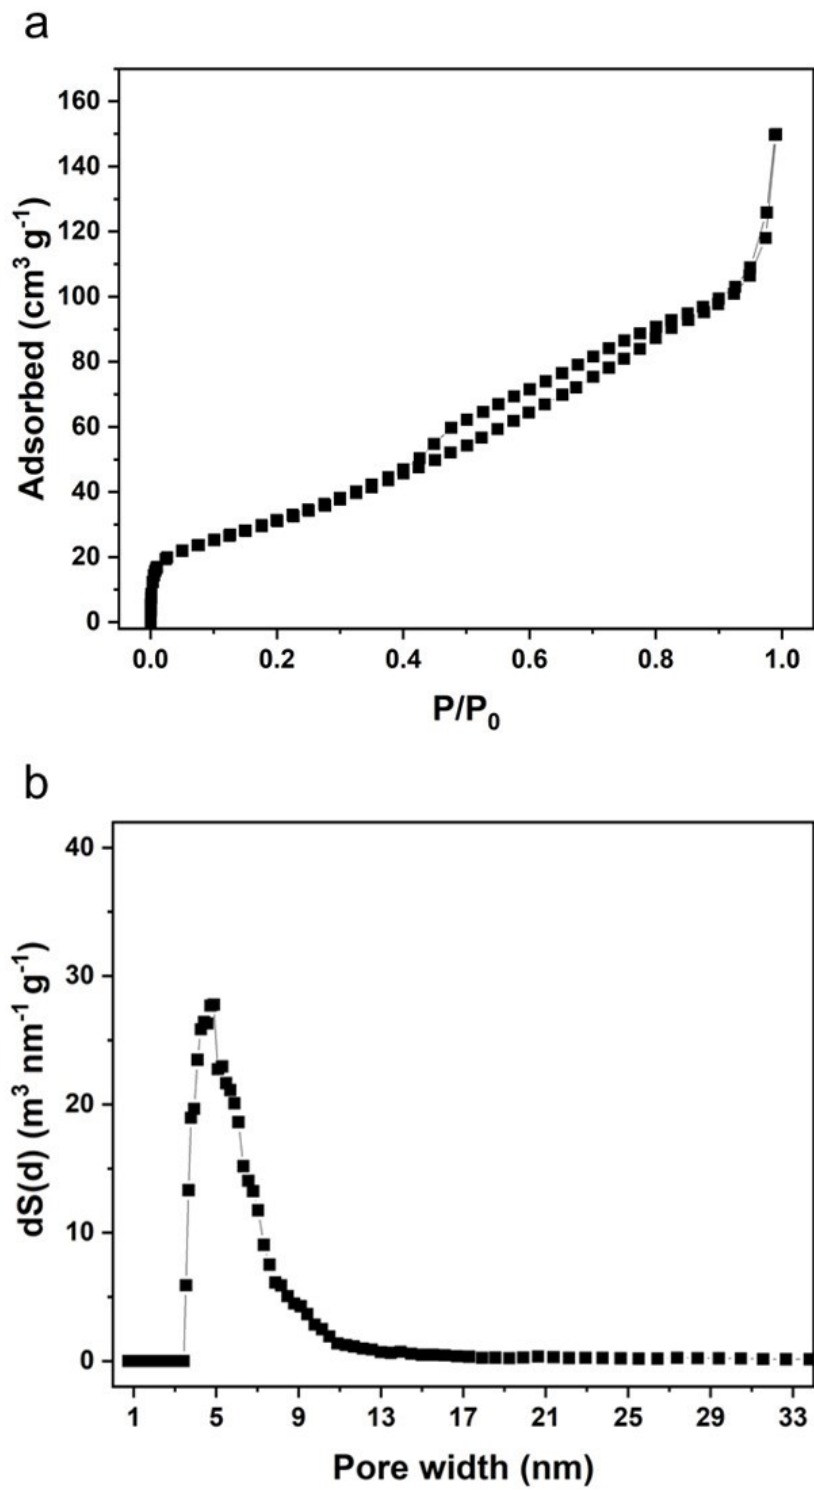

**Fig. S10.** **a** Nitrogen adsorption-desorption isotherm and **b** pore-size distribution curve of T-CuO<sub>x</sub>&FeO<sub>y</sub>/MAO.

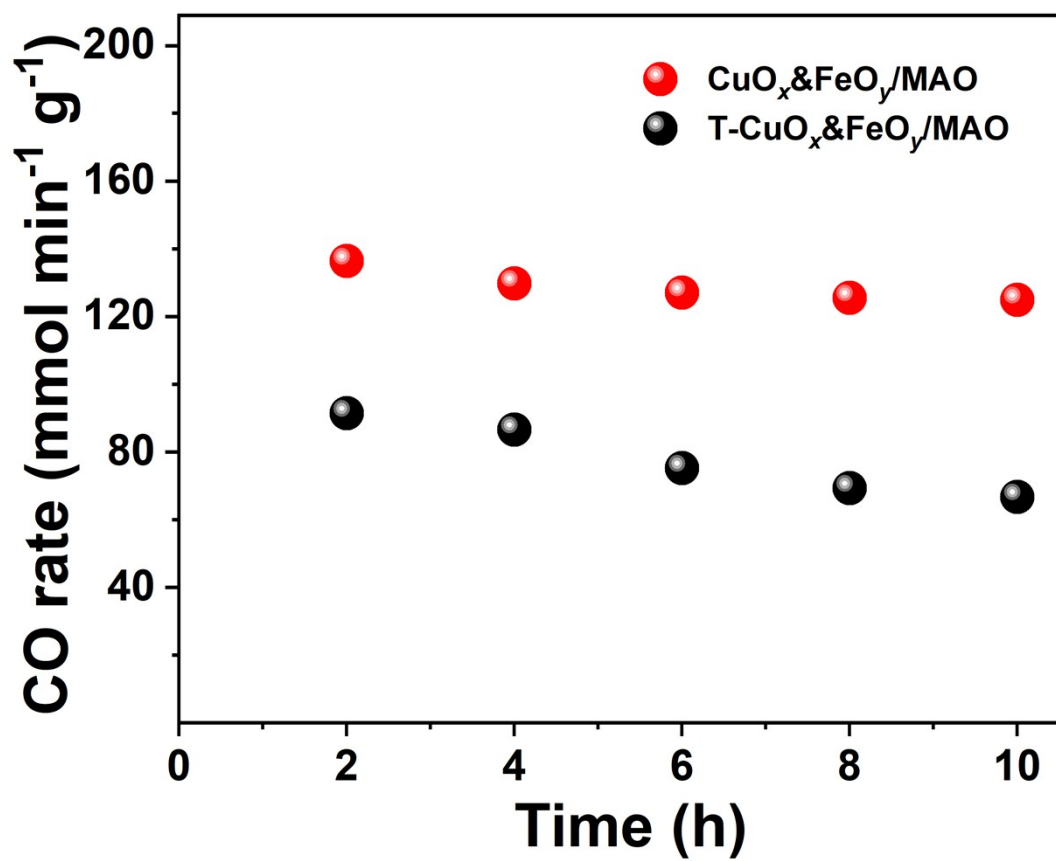

Fig. S11. Catalyst activity measurements of T-CuO<sub>x</sub>&FeO<sub>y</sub>/MAO.



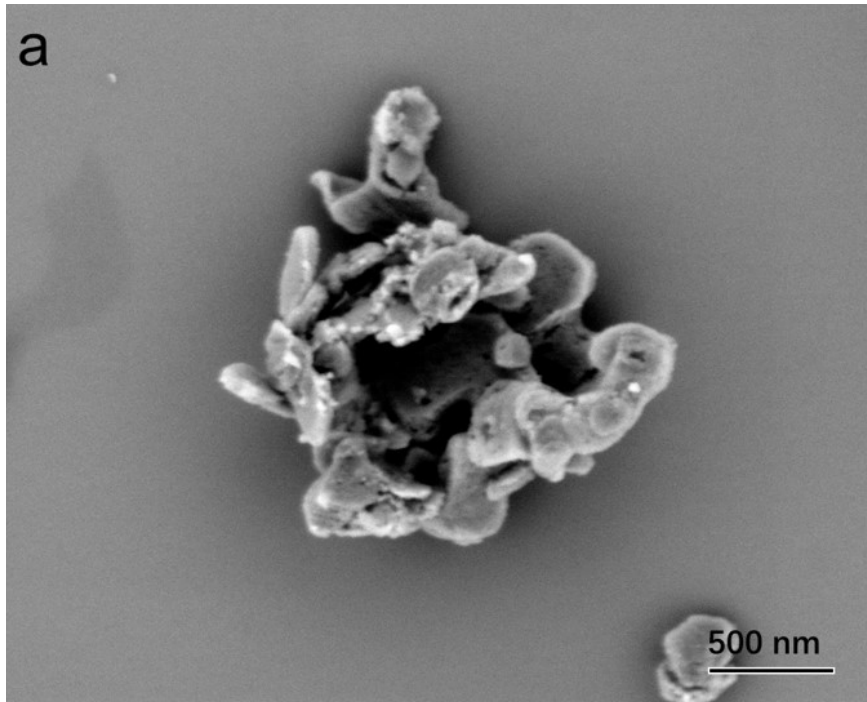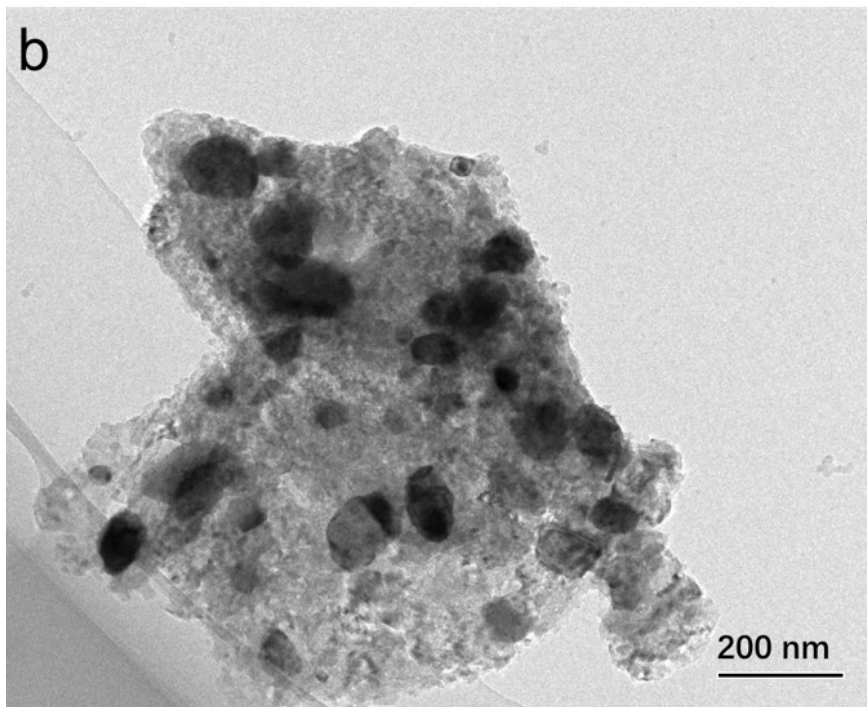

**Fig. S12.** a SEM image and b TEM image of T-CuO<sub>x</sub>&FeO<sub>y</sub>/MAO after RWGS reaction.

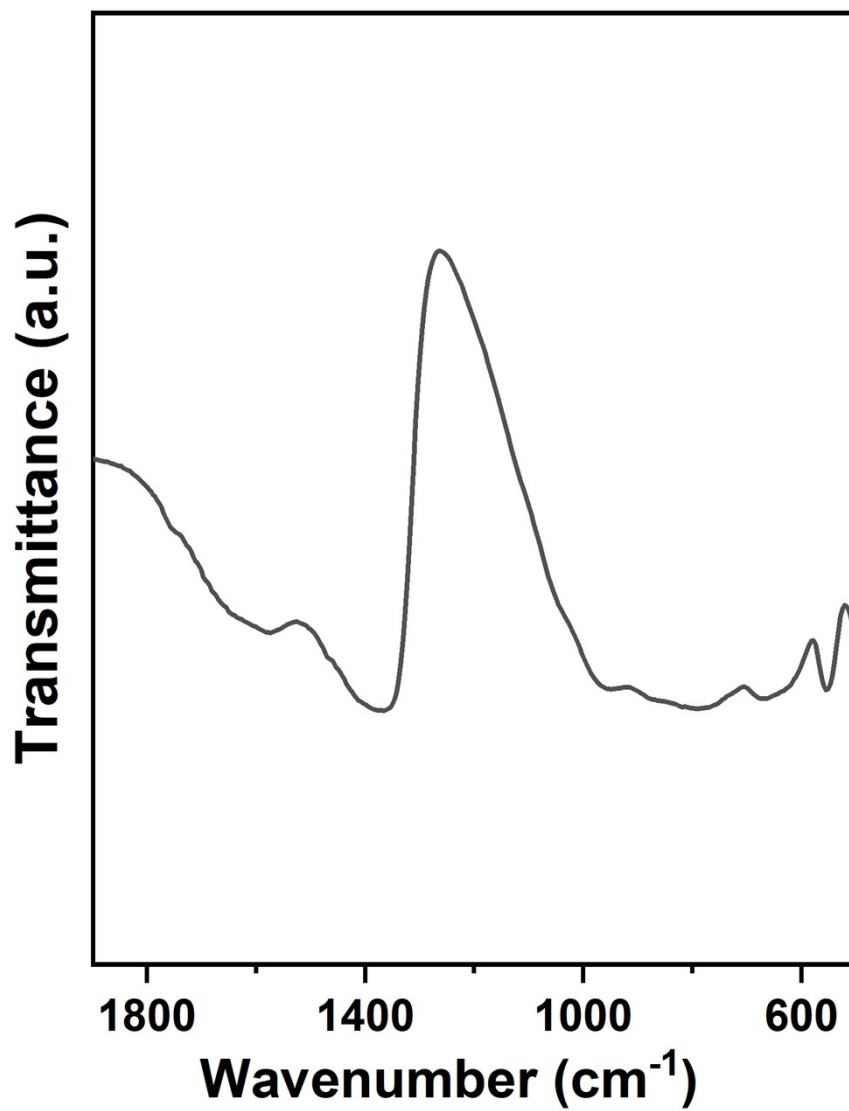

Fig. S13. FT-IR spectrum of LDH.

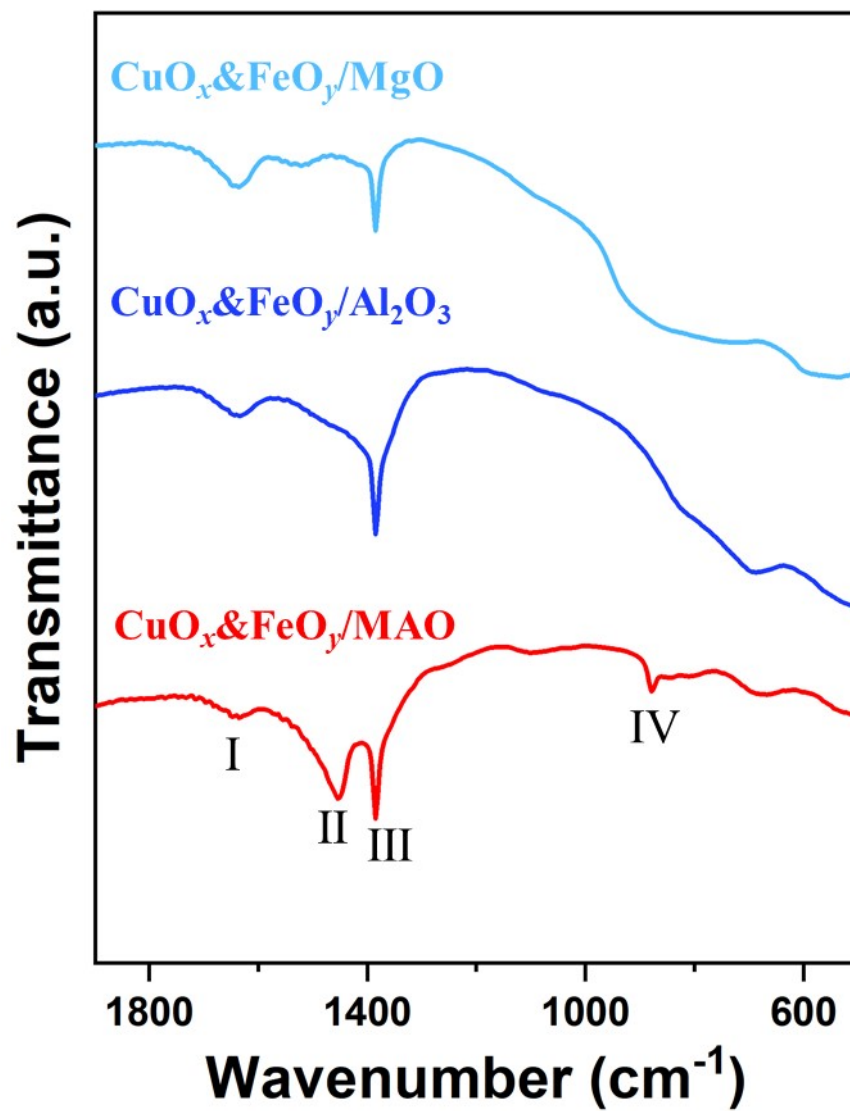

Fig. S14. FT-IR spectrum of the spent catalysts.

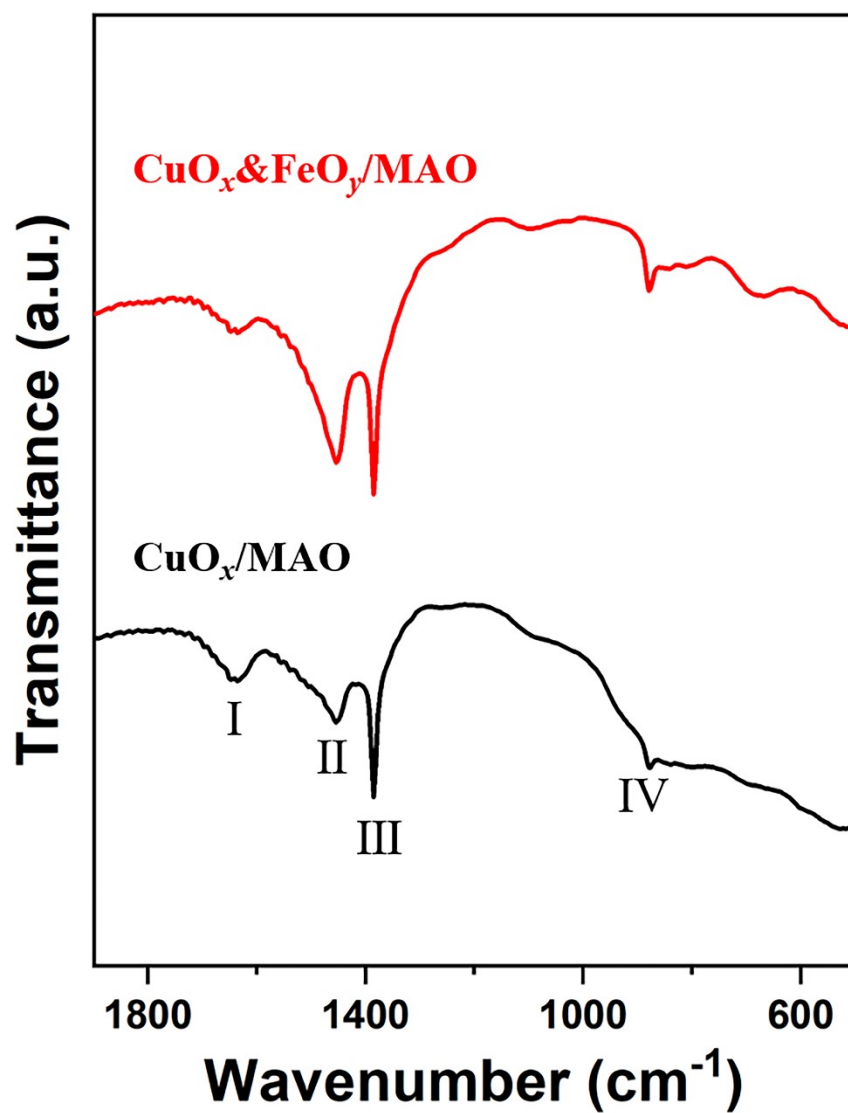

Fig. S15. FT-IR spectrum of the spent CuO<sub>x</sub>&FeO<sub>y</sub>/MAO catalyst and CuO<sub>x</sub>/MAO catalyst.

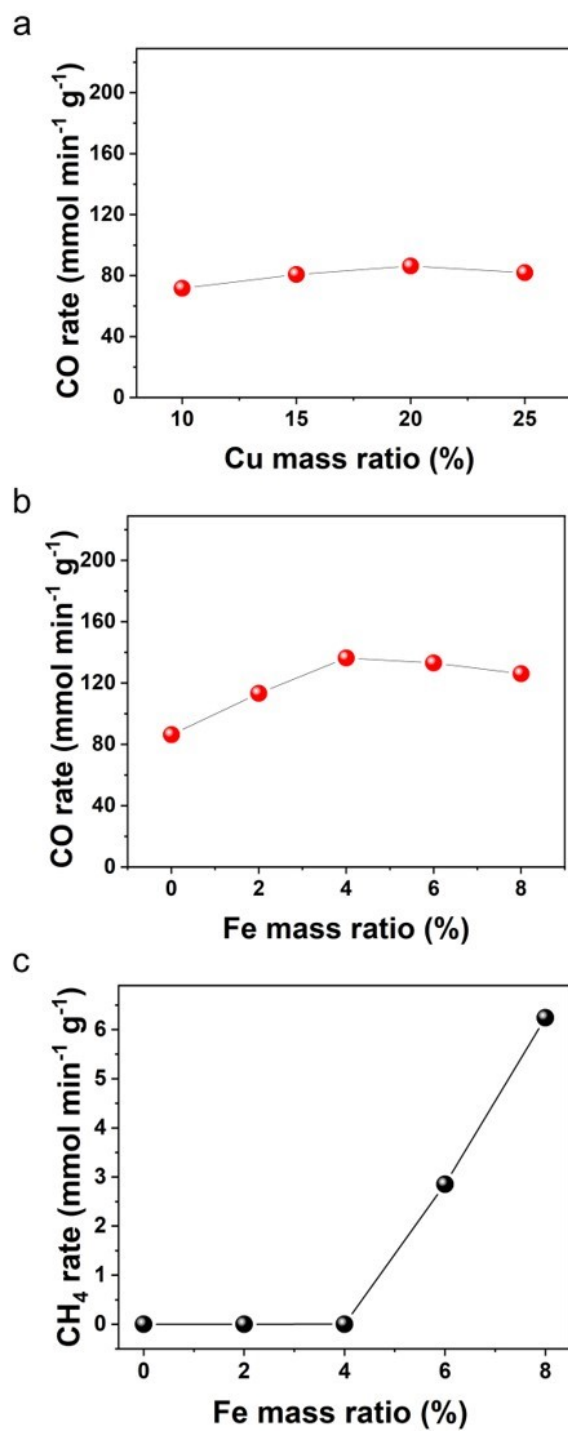

**Fig. S16.** The effect of catalyst composition on **a**, **b** CO production rate and **c** CH<sub>4</sub> production rate.

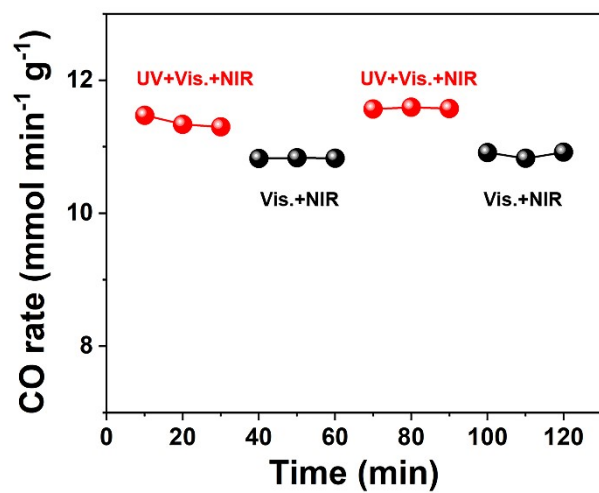

**Fig. S17.** CO evolution at photothermal condition with and without UV-light illumination over CuO<sub>x</sub>&FeO<sub>y</sub>/MAO catalyst. 30 mg of the catalyst powder, 376 °C, the total flowrate of H<sub>2</sub> and CO<sub>2</sub> (the molar ratio of H<sub>2</sub>: CO<sub>2</sub> = 1: 1) was 60.0 mL min<sup>-1</sup>.
